# Supplementary material
Source: Springer Nature journal article supplement (https://www.springermedizin.de/resource/supplementary/12906_2011_460_MOESM5_ESM.pdf/9519538)

**A****CD3+/CD8+**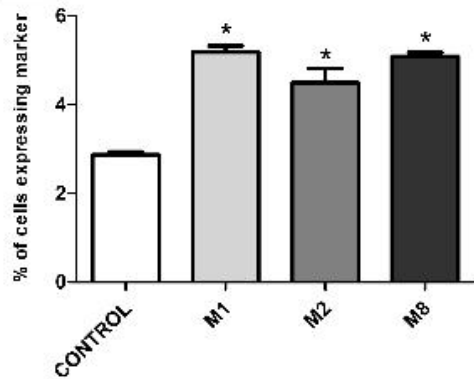**B****CD3-/CD19+**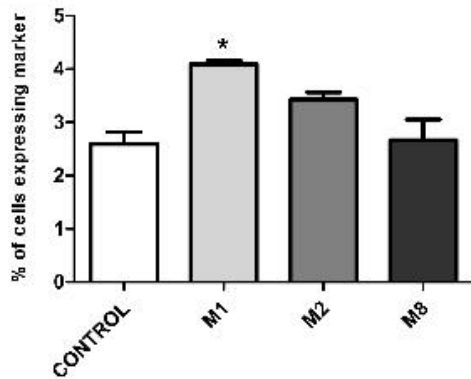**C****CD11b+**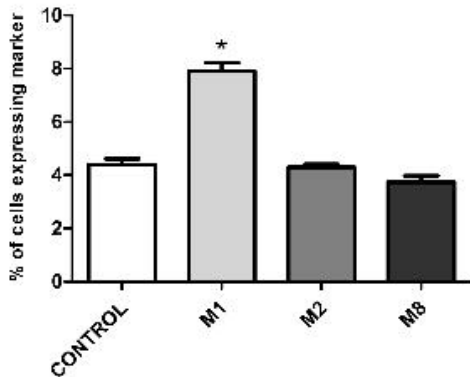

Supplement: MOESM5 [file 9519538]
